# Supplementary material for: Neural signatures representing threats along the predatory imminence continuum during dynamic predator-prey interaction
Source: Research Square preprint supplement (doi:10.21203/rs.3.rs-7708056/v1), 2025-11-19
Supplement: Supplementary file 1 [file 8a9c35ae48b30d977ad439ea.docx]

**Supplementary Materials**

**Neural signatures representing threats along the predatory imminence continuum during dynamic predator-prey interaction**

Yanan Qing, Luxuan Yang, Yuanyuan Zhang, Xianyang Gan, Jiayuan Wang, Lanqing Cheng, Song Qi, Qiong Zhang, Dean Mobbs, Benjamin Becker, Keith M. Kendrick, Shuxia Yao*

**This file includes:**

1. Supplementary Method

2. Supplementary Result

3. Supplementary Figures

4. Supplementary Tables **Supplementary methods**

**Participant inclusion criteria for Studies 3-6**

For datasets used in Studies 3-6, ESSPS were employed to distinguish the high vs. low levels of subjective emotional experience, with a rating score of 5 being used as the high level of subjective emotional experience and a rating score of 1 being treated as the low level of subjective emotional experience. In Study 31, 65 out of 67 participants (34 females, mean ± SD age = 21.50 ± 2.10 years) were used in our study due to a lack of rating scores of 5 in 2 participants. In Study 42, 44 participants (22 females, mean ± SD age = 22.07 ± 2.50 years) were reduced to 29 due to a lack of complete data for rating 1 or 5. In Study 53, 72 among 78 participants (44 females, mean ± SD age = 22.10 ± 2.68 years) were used in our study, with 6 participants being excluded for not providing a rating score of 5. Finally in Study 64, a total of 143 participants with complete data were chosen from the original 183 participants (52% females, mean ± SD age = 42.77 ± 7.30 years).

**The aversive and monetary associative learning dataset (Studies 10 & 11)**

Two independent samples were recruited to participate in an aversive (n = 40) and a monetary (n = 41) associative learning tasks respectively. The aversive associative learning task was modified based on Zhou et al.5. Participants were instructed to choose one of two Hiragana syllables that they considered being more likely to avoid a shock punishment. The task consisted of two types of blocks, the stable block and the volatile block. In the stable block, choice-outcome contingencies are stable with shape A being associated with a high probability of 75% receiving shock punishment and shape B being associated with a low punishment probability of 25%. However, in the volatile block, choice-outcome contingencies were switched every 20 trials, with shape A being associated with a high punishment probability of 80% and shape B being associated with a low punishment probability of 20% for 20 trials and vice versa in another 20 trials. Participants were instructed to adjust their choices based on feedback in real-time to avoid shock punishment. In the feedback screen, correct or incorrect responses were indicated by a grey or yellow flash appeared over the selected shape. The monetary associative learning task was identical to the aversive learning task except that correct or incorrect responses were rewarded by one point (indicated by “+1”) or zero point (indicated by “+0”) appeared over the selected shape. Each point is worth 0.2 RMB and participants were instructed to obtain as many points as possible in order to maximize their payment. Each task included a total of 160 trials, with 80 trials each in the stable and volatile associations. The fMRI data acquisition and analyses were similar to the DPPI paradigm and described in the Method section in the main text. Similar to the outcome anticipation stage, we focused on the time-window after responses but before feedback delivery for both the aversive and monetary associative learning tasks.

**Personality trait questionnaires**

Before the formal fMRI task, we collected participants’ personality questionnaires, including the State-Trait Anxiety Inventory6, Sensitivity to Punishment and Sensitivity to Reward Questionnaire7, and General Risk Propensity Scale8. The descriptive statistics results were shown in Supplementary Table 1.

**Behavioral analysis**

We employed a mixed-effects logistic regression model to examine whether anticipated confidence and perceived anxiety levels could predict escape success. We constructed 4 models which concluded confidence only (model 1), anxiety only (model 2), confidence and anxiety (model 3), and confidence, anxiety and their interaction (model 4). The optimal regression model was determined by the maximum likelihood and the lowest Akaike Information Criterion (AIC). The conceptual framework of the optimal regression model is as follows:

Escape ~ Confidence + Anxiety + Confidence * Anxiety

This model included fixed effects from predictors of confidence, anxiety and their interactions and subject-specific random factor controlling for unobserved subject-specific characteristics.

**Meta-analytic behavioral decoding of ESSPS**

Furthermore, we conducted an exploratory decoding analysis of ESSPS using the BrainStat toolbox based on data sourced from Neurosynth and NiMARE9-11, which provided a large cohort of meta-analytic activation maps automatically generated across a range of terms and topics. We calculated the voxel-wise Pearson product-moment correlation between each meta-analytic map in these databases and our unthresholded ESSPS. The top 100 functional terms or topics showing the highest correlation were extracted for display after excluding repeated terms and those depicting brain regions (e.g., insula) or techniques (e.g., TMS).

**Supplementary results**

**Confidence and anxiety predict escape success**

To examine whether anticipated confidence and anxiety levels could predict escape success/failure, we established 4 models which contained confidence only (model 1), anxiety only (model 2), confidence and anxiety (model 3), and confidence, anxiety and their interaction (model 4) using mixed-effects logistic regression models. Results showed that both confidence and anxiety levels could predict escape success in independent models. Model comparisons showed that model 4 including confidence, anxiety and their interaction fits the data best (see supplementary Table 3). Although anxiety could no longer predict escape outcomes in this model, a likelihood ratio test demonstrated that the interaction between confidence and anxiety significantly improved the explanatory power of the model (*χ2* (2) = 15.27, *p* < 0.001) relative to the model which only included the two predictors (i.e., model 3). Participants showed a higher rate of escape success when they were more confident and less anxious (CI = 0.93 to 0.98, *p* < 0.001; see supplementary Table 4). However, using a *β* coefficient test, we found that confidence has a significantly stronger impact on escape decisions than their interaction (*z* = 3.88, *p* < 0.001). These results together suggest that while anticipated confidence plays a more reliable role in escape decisions, the balance between confidence and anxiety also significantly contributes to escape success.

**Brain signatures for classifying medium vs. other predators**

In the monitoring stage, we did not identify a whole-brain multivariate predictive model that could classify either fast vs. medium predators (accuracy = 58.97 ± 5.57%, *p* = 0.141, Cohen’s *d* = 0.43) or medium vs. slow predators (accuracy = 52.56 ± 5.65%, *p* = 0.734, Cohen’s *d* = 0.70). In the decision stage, we established a neural signature for classifying medium vs. slow predators (accuracy = 75.64 ± 4.86%, *p* < 0.001, Cohen’s *d* = 1.36; see supplementary Fig. 3), but not for classifying fast vs. medium predators (accuracy = 53.85± 5.64%, *p* = 0.572, Cohen’s *d* = 0.19). In the chasing stages, we also established neural signatures for classifying fast vs. medium predators (accuracy = 69.23 ± 5.23%, *p* < 0.001, Cohen’s *d* = 1.04; see supplementary Fig. 4a-c) and medium vs. slow predators (accuracy = 88.46 ± 3.62%, *p* < 0.001, Cohen’s *d* = 2.91; see supplementary Fig. 4d-f). In the outcome anticipation stage, we also established neural signatures for classifying fast vs. medium predators (accuracy = 67.95 ± 5.28%, *p* = 0.002, Cohen’s *d* = 0.62; see supplementary Fig. 5a-c) and medium vs. slow predators (accuracy = 84.62 ± 4.09%, *p* < 0.001, Cohen’s *d* = 2.00; see supplementary Fig. 5d-f). These signatures showed generally similar patterns to signatures developed for classifying fast vs. slow predators, although in a less extensive and robust extent after applying the bootstrap thresholding procedure (bootstrapped 10000 iterations; uncorrected *p* < 0.001 for display; Supplementary Fig. 3-5), possibly due to a less difference of medium predators with fast or slow predators compared with between fast and slow predators.

**Meta-analytic decoding of ESSPS based on Neurosynth**

In addition to functional decoding based on the BrainMap database, we further utilized the Neurosynth database to functionally decode each of the unthresholded ESSPS. The top 100 terms were visualized, with larger font sizes indicating greater convergence. Results highlighted distinct cognitive and emotional processes across stages. While the ESSPS-monitoring and -chasing were disproportionately associated with theory of mind and incentive delay and pain, nociceptive, and reasoning, the patterns of ESSPS-decision and -outcome anticipation were more related to motor control/imagery, emotional responses, execution, movement, mood, anxiety, and coordination and motor function, judge, intentions, somatosensory, thinking, mentalizing, naturalistic, and reasoning and so on respectively in a more balanced manner (Supplementary Fig. 6). These findings, together with those based on the BrainMap database, consistently suggest distinct neurofunctional characteristics of ESSPS across stages.**
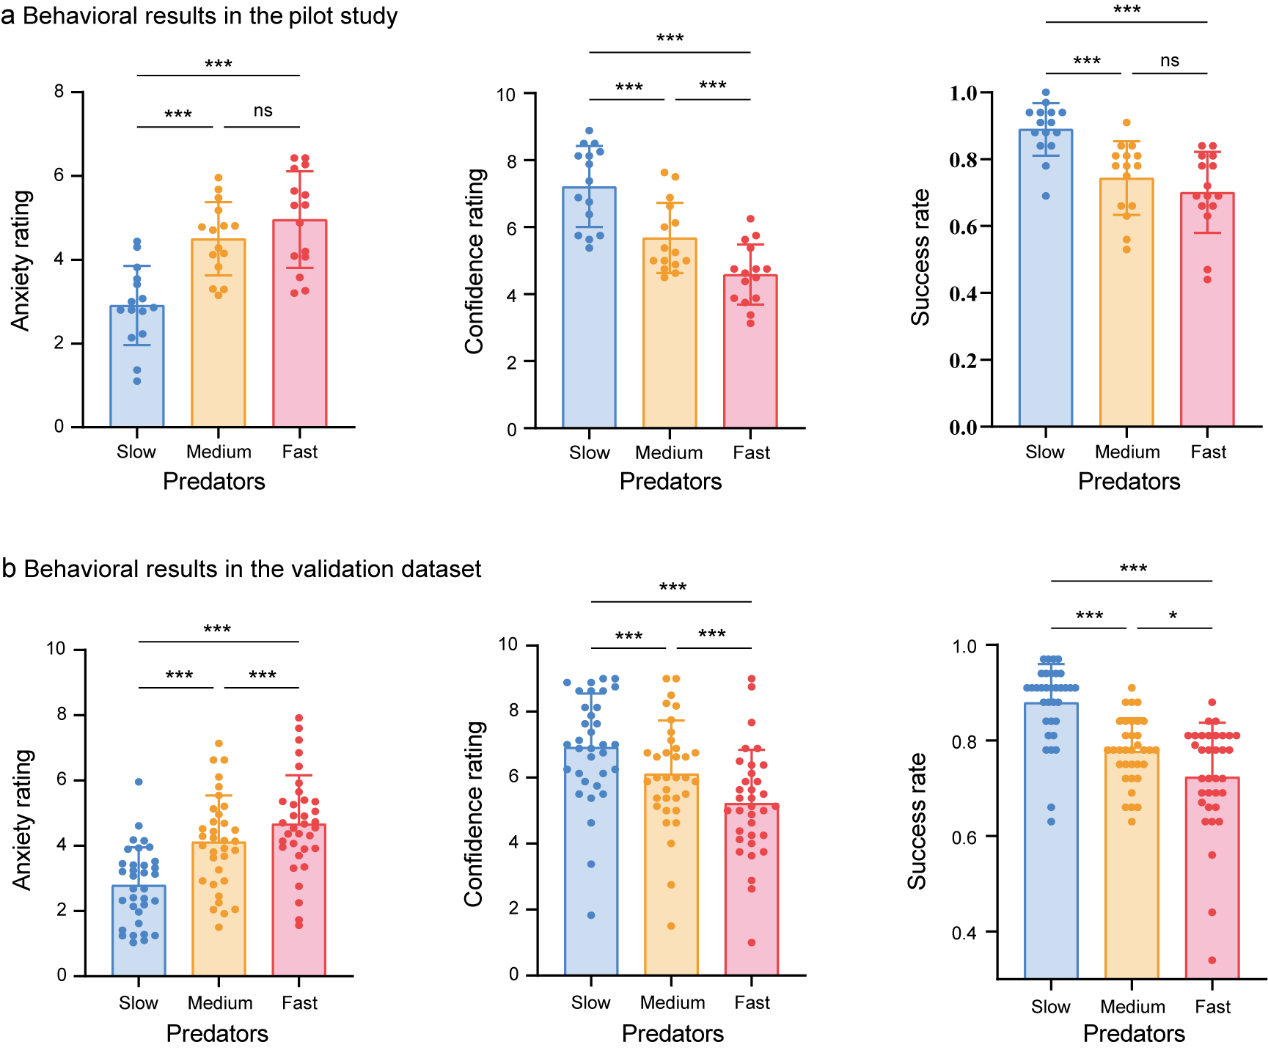
Supplementary Figures**

**Supplementary Fig. 1** Behavioral results in the pilot study and the validation dataset. **a,** Comparisons of confidence and anxiety rating scores and escape success rate across these three predators in the pilot study. **b,** Comparisons of confidence and anxiety rating scores and escape success rate across these three predators in the validation dataset.


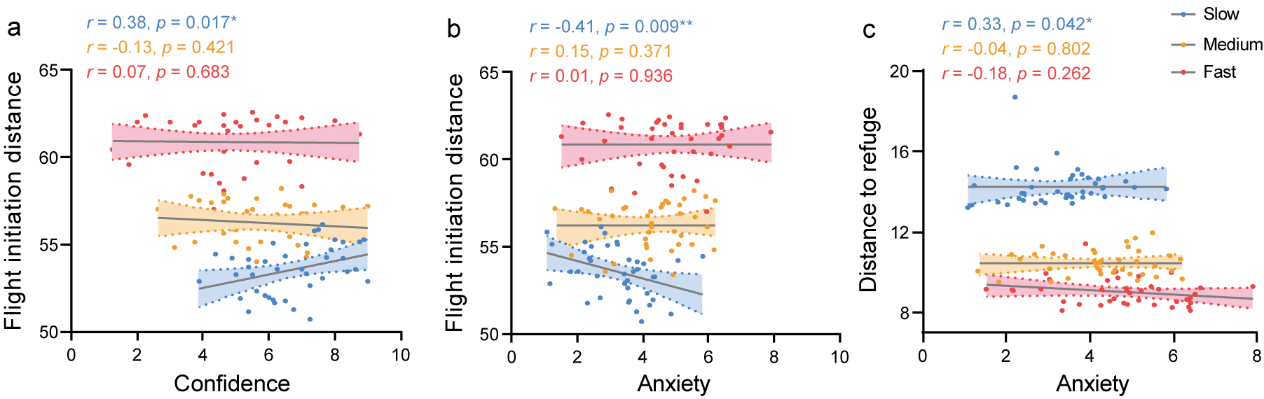
**Supplementary Fig. 2** Correlations of rating scores with flight initiation distance (FID) and distance to refuge (DTR) in response to the slow predator. **a,** Correlation between FID and confidence rating scores. **b,** Correlation between FID and anxiety rating scores. **c,** Correlation between DTR and anxiety rating scores.


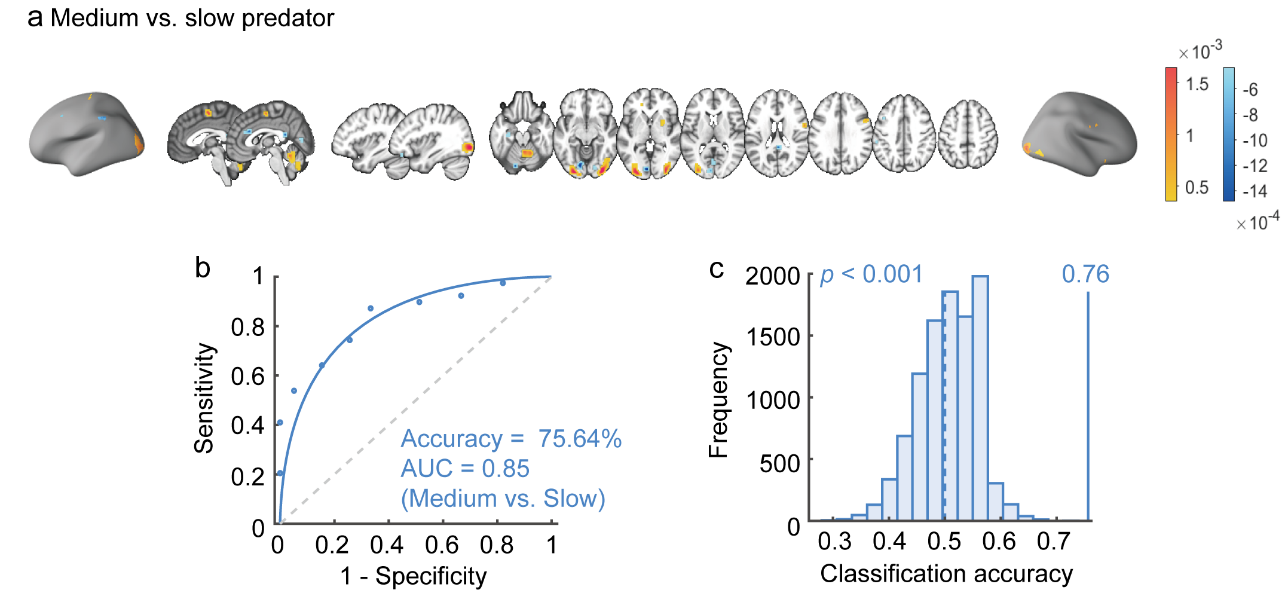
**Supplementary Fig. 3** **The brain signature for classifying medium vs. slow predators in the decision stage.** **a**, Core brain systems representing medium vs. slow predators. **b & c,** Performance for the signature presented in ROC plot and permutation results.**
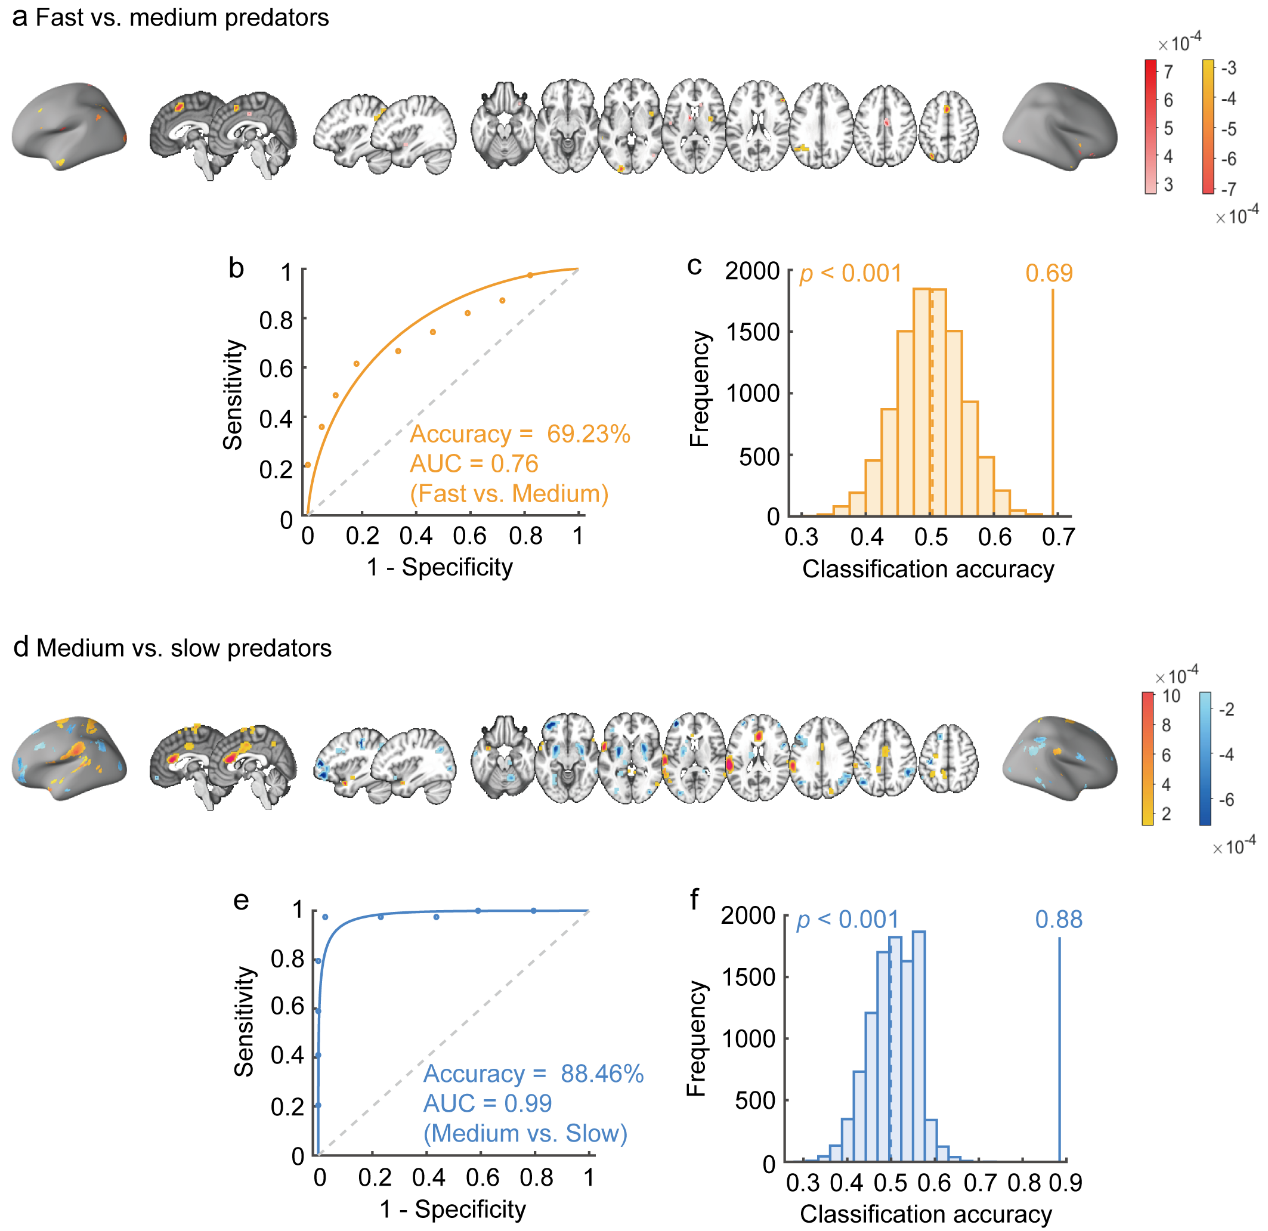
Supplementary Fig. 4** **Brain signatures for classifying between medium and other predators in the chasing stage.** **a-c**, Core brain systems of signature for classifying fast vs. medium predators, ROC plot and permutation results. **d-f**, Core brain systems of signature for classifying medium vs. slow predators, ROC plot and permutation results.
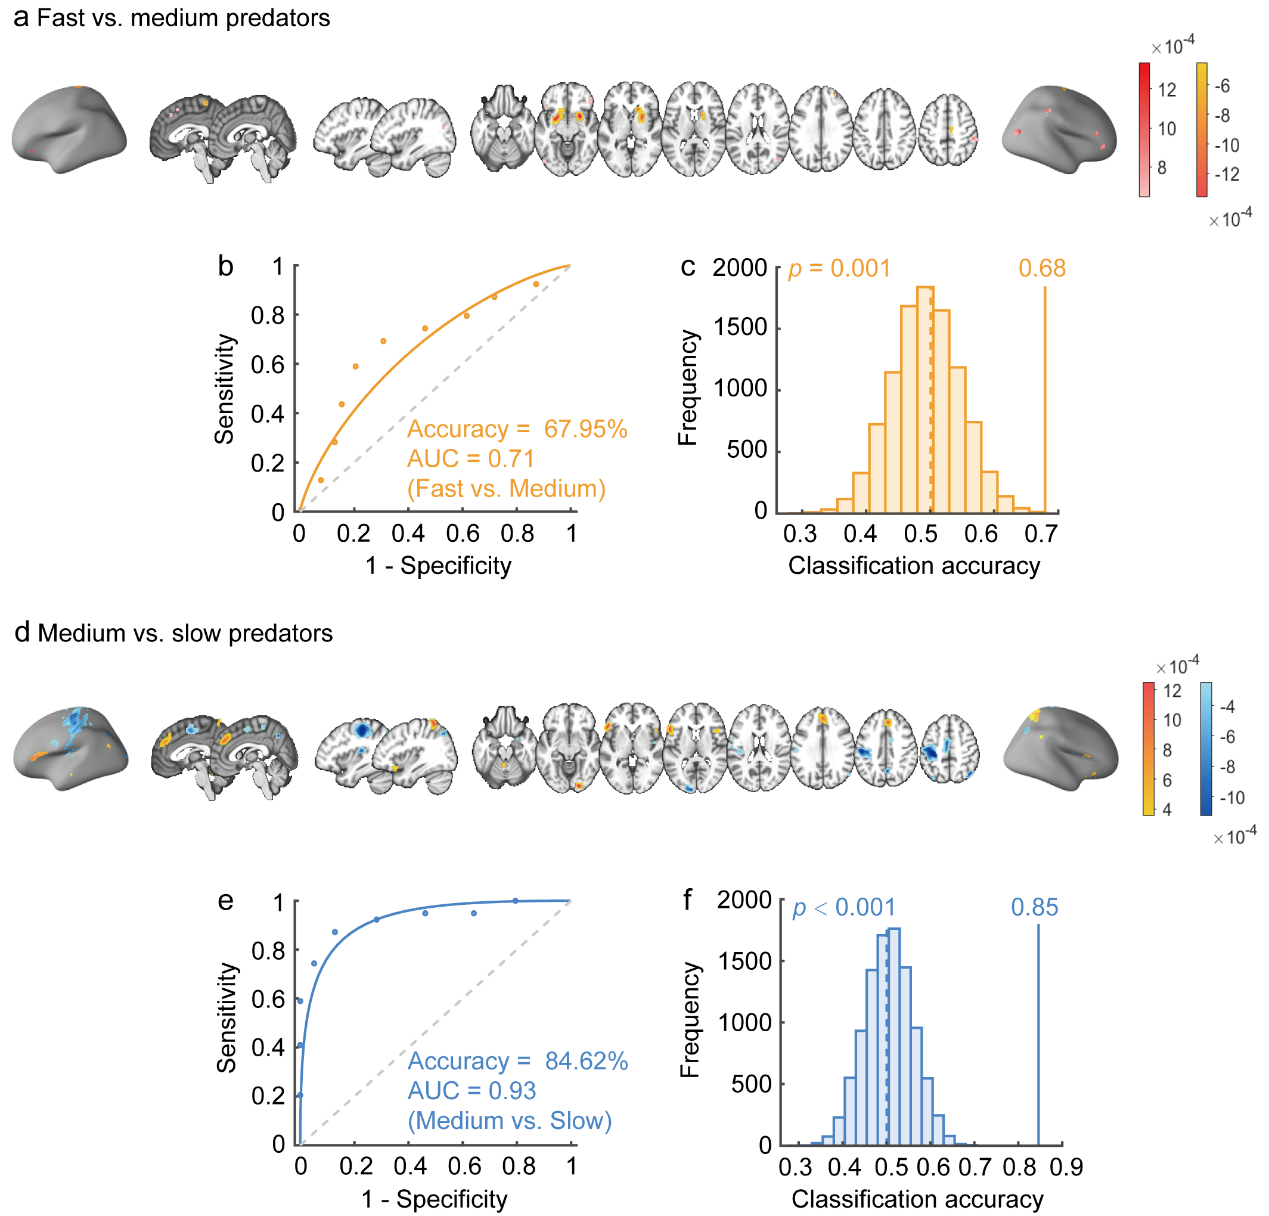
**Supplementary Fig. 5** **Brain signatures for classifying between medium and other predators in the outcome anticipation stage.** **a-c**, Core brain systems of signature for classifying fast vs. medium predators, ROC plot and permutation results. **d-f**, Core brain systems of signature for classifying medium vs. slow predators, ROC plot and permutation results.
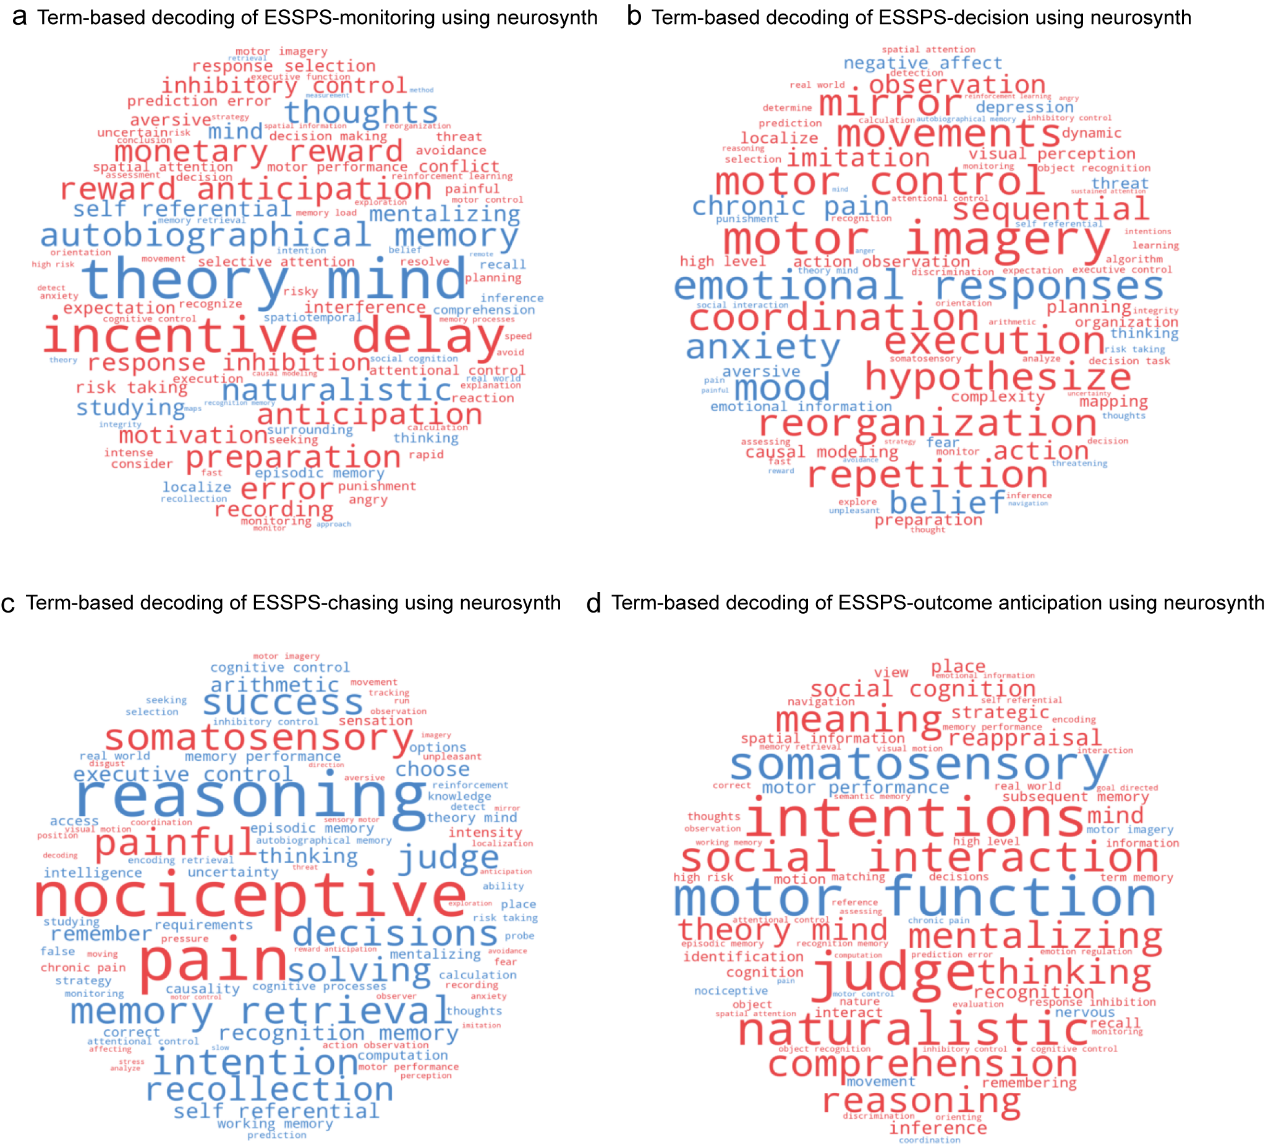
**Supplementary Fig. 6** **Neurosynth functional decoding of the unthresholded ESSPS.** **a-d**, Word clouds for each ESSPS in different stages. The 100 most strongly correlated terms were displayed with a larger font size indicating a larger Pearson correlation coefficient.**Supplementary Tables**

**Supplementary Table 1.** Descriptive statistics results of questionnaires

| Questionnaires | M ± SD | Minimum | Maximum |
| --- | --- | --- | --- |
| State anxiety scores | 39.56 ± 7.92 | 28.00 | 62.00 |
| Trait anxiety scores | 40.90 ± 7.30 | 30.00 | 61.00 |
| Sensitivity to punishment scores | 9.13 ± 3.56 | 0.00 | 16.00 |
| Sensitivity to reward scores | 7.36 ± 2.42 | 2.00 | 12.00 |
| General risk propensity scores | 24.21 ± 5.88 | 10.00 | 35.00 |

**Supplementary Table 2.** Model comparisons of escape prediction

| Models | Predictors | *β* | *Odds Ratios* | *CI* | *p* | AIC |
| --- | --- | --- | --- | --- | --- | --- |
| Model1: escape ~ FID + (1 | subject) | (Intercept) | -1.74 | 0.17 | 0.11-0.27 | < 0.001 | 3283.99 |
| FID | 0.06 | 1.06 | 1.05-1.07 | < 0.001 |
| Model2: escape ~ DTR + (1 | subject) | (Intercept) | 3.79 | 44.25 | 33.25-58.90 | < 0.001 | 3132.93 |
| DTR | -0.19 | 0.83 | 0.81-0.85 | < 0.001 |
| Model3: escape ~ FID + DTR + (1 | subject) | (Intercept) | 0.97 | 2.63 | 1.46-4.71 | 0.001 | 3021.08 |
| FID | 0.05 | 1.05 | 1.04-1.06 | < 0.001 |
| DTR | -0.17 | 0.84 | 0.82-0.86 | < 0.001 |
| Model4: escape ~ FID + DTR + FID * DTR + (1 | subject) | (Intercept) | 3.07 | 21.61 | 4.22-110.72 | < 0.001 | 3015.63 |
| FID | 0.08 × 10-1 | 1.01 | 0.98-1.04 | 0.606 |
| DTR | -0.33 | 0.72 | 0.64-0.81 | < 0.001 |
| FID*DTR | 0.03 × 10-1 | 1.00 | 1.00-1.01 | 0.007 |

**Supplementary Table 3**. Model comparisons of confidence and anxiety

| Models | Predictors | *β* | *Odds Ratios* | *CI* | *p* | AIC |
| --- | --- | --- | --- | --- | --- | --- |
| Model1: escape ~ confidence + (1 | subject) | (Intercept) | 0.87 | 2.38 | 1.82-3.12 | < 0.001 | 3486.67 |
| confidence | 0.12 | 1.12 | 1.07-1.18 | < 0.001 |
| Model2: escape ~ anxiety + (1 | subject) | (Intercept) | 3.08 | 21.85 | 15.83-30.15 | < 0.001 | 3353.67 |
| anxiety | -0.34 | 0.71 | 0.67-0.75 | < 0.001 |
| Model3: escape ~ confidence + anxiety + (1 | subject) | (Intercept) | 3.16 | 23.67 | 13.92-40.27 | < 0.001 | 3355.54 |
| confidence | -0.01 | 0.99 | 0.93-1.05 | 0.709 |
| anxiety | -0.35 | 0.71 | 0.66-0.75 | < 0.001 |
| Model4: escape ~ confidence + anxiety + confidence * anxiety + (1 | subject) | (Intercept) | 1.84 | 6.28 | 2.70-14.58 | < 0.001 | 3342.27 |
| confidence | 0.23 | 1.25 | 1.10-1.44 | 0.001 |
| anxiety | -0.11 | 0.90 | 0.79-1.03 | 0.121 |
| confidence*anxiety | -0.05 | 0.96 | 0.93-0.98 | < 0.001 |

**Supplementary Table 4**. Mixed-effects logistic model predicting escape success

| Fixed effects | *β* | *SE* | *p* | *95%CI* |
| --- | --- | --- | --- | --- |
| Intercept | **1.84** | **0.43** | **< 0.001** | **2.70-14.58** |
| Confidence | **0.23** | **0.07** | **0.001** | **1.10-1.44** |
| Anxiety | -0.11 | 0.07 | 0.121 | 0.79-1.03 |
| Confidence*Anxiety | **-0.05** | **0.01** | **< 0.001** | **0.93-0.98** |
| Random effects | *Variance* |  |  |  |
| Subject intercept | 0.23 |  |  |  |
| Residual | 3.29 |  |  |  |

Note. Bolded coefficients are statistically significant (*p* < 0.05).

**Supplementary Table 5.** Selected ROIS for Figure 6a-c.

| ROI | Areas included | Atlas |
| --- | --- | --- |
| Hippocampus | Hippocampus_L, Hippocampus_R | Automated Anatomical  Labeling (AAL) atlas12 |
| Posterior cingulate cortex | Cingulum_Post_L, Cingulum_Post_L |
| Ventral medial prefrontal cortex | Frontal_Med_Orb_L; Frontal_Med_Orb_R |
| Amygdala | Amygdala_L, Amygdala_R |
| Middle cingulate cortex | Cingulum_Mid_L, Cingulum_Mid_L |
| Periaqueductal gray | dmPAG, vlPAG_L, lPAG_L,  vlPAG_R, lPAG_R | Kragel, 201913 |

**Supplementary Table 6.** Decoding accuracies of whole-brain-based ESSPS and local defensive network.

| Stages | Whole-brain decoding | | | Defensive network decoding | | |
| --- | --- | --- | --- | --- | --- | --- |
| Accuracy ± SE | *p* | Cohen’s *d* | Accuracy ± SE | *p* | Cohen’s *d* |
| Monitoring stage | 70.51 ± 5.16% | < 0.001 | 1.15 | 62.82 ± 5.47% | 0.031 | 0.57 |
| Decision stage | 78.21 ± 4.67% | < 0.001 | 1.49 | 62.82 ± 5.47% | 0.031 | 0.77 |
| Chasing stage | 94.87 ± 2.50% | < 0.001 | 3.32 | 83.33 ± 4.22% | < 0.001 | 1.90 |
| Anticipation stage | 85.90 ± 3.94% | < 0.001 | 2.26 | 73.08 ± 5.02% | < 0.001 | 1.39 |

**References**

1. Zhou, F., et al. A distributed fMRI-based signature for the subjective experience of fear. *Nat. Commun.* **12**, 6643 (2021).

2. Liu, X., et al. A neural signature for the subjective experience of threat anticipation under uncertainty. *Nat. Commun.* **15**, 1544 (2024).

3. Gan, X., et al. A neurofunctional signature of subjective disgust generalizes to oral distaste and socio-moral contexts. *Nat. Hum. Behav.* **8**, 1383-1402 (2024).

4. Chang, L.J., Gianaros, P.J., Manuck, S.B., Krishnan, A. & Wager, T.D. A sensitive and specific neural signature for picture-induced negative affect. *PLoS Biol.* **13**, e1002180 (2015).

5. Zhou, M., et al. Neural and behavioral evidence for oxytocin’s facilitatory effects on learning in volatile and stable environments. *Commun. Biol.* **7**, 109 (2024).

6. Spielberger, C.D., Gonzalez-Reigosa, F., Martinez-Urrutia, A., Natalicio, L.F.S. & Natalicio, D.S. The State-Trait Anxiety Inventory. *Interam. J. Psychol.* **5** (2017).

7. Torrubia, R., Ávila, C., Moltó, J. & Caseras, X. The Sensitivity to Punishment and Sensitivity to Reward Questionnaire (SPSRQ) as a measure of Gray's anxiety and impulsivity dimensions. *Pers. Individ. Differ.* **31**, 837-862 (2001).

8. Zhang, D.C., Highhouse, S. & Nye, C.D. Development and validation of the General Risk Propensity Scale (GRiPS). *J. Behav. Decis. Mak.* **32**, 152-167 (2019).

9. Larivière, S., et al. BrainStat: a toolbox for brain-wide statistics and multimodal feature associations. *NeuroImage* **266**, 119807 (2023).

10. Salo, T., et al. NiMARE: neuroimaging meta-analysis research environment. *Aperture Neuro* **3** (2023).

11. Yarkoni, T., Poldrack, R.A., Nichols, T.E., Van Essen, D.C. & Wager, T.D. Large-scale automated synthesis of human functional neuroimaging data. *Nat. Methods* **8**, 665-670 (2011).

12. Tzourio-Mazoyer, N., et al. Automated anatomical labeling of activations in SPM using a macroscopic anatomical parcellation of the MNI MRI single-subject brain. *NeuroImage* **15**, 273-289 (2002).

13. Kragel, P.A., et al. Functional involvement of human periaqueductal gray and other midbrain nuclei in cognitive control. *J. Neurosci.* **39**, 6180-6189 (2019).
